## Index rerum ad vol. 23

- Abcès scrotaux** simulants une hernie inguinale, 351  
**Autotransplantation rénale**, 224
- Blasenersatzoperationen**, 436  
**Blasenkarzinom**, transurethrale Resektion, 244  
**Blasenscheidenfisteln** nach Hysterektomie, 230  
**Bricker Operation**, 89
- Calculos coraliformes**, el colgajo pielo-renal, 326  
**Calculs d'acid urique**, 411  
 – du rein, dissolution chimique, 236  
**Cancer de la vessie**, résection trans-urétrale, 244  
 – de l'ouraque, clinique et traitement, 519  
**Carcinoma of the bladder**, transurethral resection, 244  
**Chemolysis of renal lithiasis**, 236  
**Cowperitis calculosa**, 549
- Dérivation urinaire artificielle** chez l'enfant, 1  
 –, indications, 8  
 –, dans le sigmoïde non isolé, 15  
 –, dans le colon isolé, 53  
 –, dans l'iléon isolé, 82  
 –, implantations cutanées, 103  
 –, réintervention, 135  
**Duplication of bladder, urethra and lower genital organs**, 514
- Estenosis de la uretra posterior**, invaginación, 364  
**Ethyl Carbamate**, renal response, 309  
**Extrophic bladder**, reconstruction in one session, 151
- Fistules vaginales** après hystérectomie, 230
- Genitaltuberkulose des Mannes** und chemisches Milieu, 356  
**Gersuny Operation**, 75
- Haematuria**, 275  
**Harnableitung** beim Kinde, 1  
 –, Indikationen, 8  
 – in den ausgeschalteten Dickdarm, 53  
 – in den ausgeschalteten Dünndarm, 82  
 – in den nicht ausgeschalteten Dickdarm, 15  
 – in die Haut, 103  
 –, Revision bei Mängeln, 135  
**Harnblase**, Aufbau bei Exstrophie, 151  
**Harnleukozyten** bei entzündlichen Erkrankungen, 377  
**Harnsäuresteinbildung**, 411  
**Heitz-Boyer-Hovelacque Operation**, 63, 74  
**Hirschgeweihesteine**, eine neue Entfernungstechnik, 326  
**Histrectomia**, fistulas vesico-vaginales, 230  
**Homotransplantation rénale**, nouvelle technique, 201  
**Hyperparathyreoidismus** et urolithiasis, 315  
**Hypertension rénovasculaire**, autotransplantation, 224
- Incontinence d'effort** dans le prolapsus génital, 561  
**Intracapsular prostatic resection**, 535
- Leucocytes urinaires** dans les pyélonéphrites, 377  
**Litogénese urica**, 411
- Maydl Operation**, 41  
**Missbildung von Blase, Harnröhre und Genitalorganen**, 514  
**Moniliasis albicans vesicae**, 428  
**Muguet de la vessie**, 428

## Index rerum

- Nephro-seminal vesicular malformation, 492
- Nierenaotransplantation, 224
- Nierenhomotransplantation, neue Technik, 201
- Nieren-Samenblasen-Missbildung, 492
- Nierensteinchemolyse, instrumentelle, 236
- Nierenteilresektion und Hypoxieresis-tenz, 388
- Nierentuberkulose, Radioisotopen-Diagnostik, 263
- Partial renal resection and resistance to hypoxia, 388**
- Prolapso genital, incontinencia de stress, 561
- Prostatarsektion, intrakapsuläre, 535
- Prostatectomia suprapubica y la resección transuretral, estudio comparativo, 454
- Prostatectomie transvésicale sans sonde, 447
- Pyelo-interstitieller Reflux, 289
- Pyuria in infants and young children, 335
- Reflux pyélo-interstitiel, 289**
- Renal autotransplantation, 224
- , homotransplantation, new surgical technique, 201
- , tuberculosis, radioisotopes in diagnosis, 263
- Renolitoquimiolisis, 236
- Résection prostatique intracapsulaire, 535
- Renovascular hypertension, autotransplantation, 224
- Riñón, auto trasplante, 224
- , homotrasplante, nueva técnica, 201
- Scrotal abscesses simulating inguinal hernias, 351**
- Staghorn calculi, a new technique of removal, 326
- Sternheimer-Malbin cells, 377
- Stressinkontinenz bei Genitalprolaps, 561
- Strictures de l'urètre, procédé de l'invagination, 364
- Strikturen der hinteren Harnröhre, Invaginationsverfahren, 364
- Suprapubische Prostatektomie und transurethrale Elektroresektion, Spätergebnisse, 454
- Supravesical urinary diversion in children, 130
- Tiersch-Tuffier Operation, 49**
- Transvesikale Prostatektomie ohne Katheter, 447
- Tuberculose rénale, le diagnostic isotopique, 263
- Tuberculosis of the male genital organs, 356
- Urchuskarzinom, Klinik und Therapie, 519**
- Uretero-sigmoidostomia, 15
- Ureterostomia cutanea, 103
- Urethral stricture, invagination technic, 364
- Urethane, renal response, 309
- Uric acid calculi, 411
- Urinary Diversion in children, 1
- by cutaneous ureterostomy, 103
- by isolated ileal loop, 82
- , indication, 8
- in the not excluded great gut, 15
- into an excluded part of the large intestine, 53
- , revision, 135
- leucocytes in inflammatory diseases, 377
- Urolithiasis et hyperparathyreoidismus, 315
- Vejiga, resección transuretral del carcinoma, 244**
- , sustituciones, 436
- , urinaria, monilias, 428
- Vesical prothesis, 436
- Vesico-vaginal fistulas after hysterectomy, 230
- Vessie extrophique, reconstruction en un temps, 151
- , les remplacements, 436
